# Supplementary material for: De novo transcriptome assembly of Zanthoxylum bungeanum using Illumina sequencing for evolutionary analysis and simple sequence repeat marker development
Source: PubMed Central journal article supplement (PMC5711952; doi:10.1038/s41598-017-15911-7), 2017-12-01
Supplement: 41598_2017_15911_MOESM1_ESM.pdf [file 41598_2017_15911_MOESM1_ESM.pdf]

***De novo* transcriptome assembly of *Zanthoxylum bungeanum* using Illumina sequencing for evolutionary analysis and simple sequence repeat marker development**

**Shijing Feng<sup>1</sup>, Lili Zhao<sup>1</sup>, Zhenshan Liu<sup>2</sup>, Yulin Liu<sup>1</sup>, Tuxi Yang<sup>1</sup> & Anzhi Wei<sup>1</sup>**

<sup>1</sup>College of Forestry, Northwest A&F University, Yangling, Shaanxi 712100, China. <sup>2</sup>College of Life Science, Northwest A&F University, Yangling, Shaanxi 712100, China. Correspondence and requests for materials should be addressed to A.W. (email: [weianzhi@126.com](mailto:weianzhi@126.com)). <sup>†</sup>Co-first author: this author contributed equally to this paper

**Supplement Table S1.** The 31 cultivars of *Zanthoxylum bungeanum* and *Z. armatum* used in the present study.

| Code | Cultivar            | Species             | Location            |
|------|---------------------|---------------------|---------------------|
| 1    | Fengxianqiyuejiao   | <i>Z. bungeanum</i> |                     |
| 2    | Fengxiandahongpao   | <i>Z. bungeanum</i> | Fengxian, Shaanxi   |
| 3    | Fengxianzhuyejiao   | <i>Z. armatum</i>   |                     |
| 4    | Yehujiao            | <i>Z. bungeanum</i> |                     |
| 5    | Hanchengdahongpao   | <i>Z. bungeanum</i> |                     |
| 6    | Shizitou            | <i>Z. bungeanum</i> | Hancheng, Shaanxi   |
| 7    | Choujiao            | <i>Z. bungeanum</i> |                     |
| 8    | Fuguhujiao          | <i>Z. bungeanum</i> | Fugu, Shaanxi       |
| 9    | Xunyanghuajiao      | <i>Z. bungeanum</i> |                     |
| 10   | Goujiao             | <i>Z. armatum</i>   | Xunyang, Shaanxi    |
| 11   | Wududahongpao       | <i>Z. bungeanum</i> |                     |
| 12   | Wudubayuejiao       | <i>Z. bungeanum</i> | Wudu, Gansu         |
| 13   | Baijiao             | <i>Z. bungeanum</i> |                     |
| 14   | Youjiao             | <i>Z. bungeanum</i> | Qin'an, Gansu       |
| 15   | Qin'anyihao         | <i>Z. bungeanum</i> |                     |
| 16   | Hanyuanhuajiao      | <i>Z. bungeanum</i> |                     |
| 17   | Maowenhuajiao       | <i>Z. bungeanum</i> | Hanyuan, Sichuan    |
| 18   | Hanyuanqinghuajiao  | <i>Z. armatum</i>   |                     |
| 19   | Zizhongzhuyejiao    | <i>Z. armatum</i>   |                     |
| 20   | Tengjiao            | <i>Z. armatum</i>   | Zizhong, Sichuan    |
| 21   | Guizhouhuajiao      | <i>Z. bungeanum</i> |                     |
| 22   | Guizhouzhuyejiao    | <i>Z. armatum</i>   | Liupanshui, Guizhou |
| 23   | Dingtanhujiao       | <i>Z. armatum</i>   | Guanling, Guizhou   |
| 24   | Yunnanhuajiao       | <i>Z. bungeanum</i> |                     |
| 25   | Jiuyeqinghuajiao    | <i>Z. armatum</i>   | Kunming, Yunnan     |
| 26   | Yunnanzhuyejiao     | <i>Z. armatum</i>   |                     |
| 27   | Shandongdahongpao   | <i>Z. bungeanum</i> |                     |
| 28   | Shandongxiaohongpao | <i>Z. bungeanum</i> | Laiwu, Shandong     |
| 29   | Huangjinjiao        | <i>Z. bungeanum</i> |                     |
| 30   | Shanxidahongpao     | <i>Z. bungeanum</i> | Wutai, Xinzhou      |
| 31   | Germanhuajiao       | <i>Z. bungeanum</i> | Germa               |

**Supplement Table S2.** The genetic diversity parameters of 11 SSR primer pairs.

|                     | Primers | $N_a$ | $N_e$ | $I$   | $H_o$ | $H_e$  | $F_{IS}$ |
|---------------------|---------|-------|-------|-------|-------|--------|----------|
| <i>Z. bungeanum</i> | ZB2     | 2.000 | 1.658 | 0.586 | 0.546 | 0.406  | -0.485   |
|                     | ZB4     | 3.000 | 2.390 | 0.978 | 0.864 | 0.595  | -0.375   |
|                     | ZB11    | 5.000 | 4.246 | 1.523 | 1.000 | 0.782  | -0.375   |
|                     | ZB28    | 6.000 | 3.796 | 1.524 | 0.773 | 0.754  | -0.308   |
|                     | ZB30    | 6.000 | 4.840 | 1.641 | 1.000 | 0.812  | -0.281   |
|                     | ZB32    | 6.000 | 2.830 | 1.266 | 0.409 | 0.662  | -0.260   |
|                     | ZB43    | 7.000 | 3.270 | 1.514 | 0.955 | 0.710  | -0.202   |
|                     | ZB69    | 4.000 | 2.085 | 0.939 | 0.667 | 0.533  | -0.199   |
|                     | ZB73    | 4.000 | 1.972 | 0.937 | 0.591 | 0.504  | -0.049   |
|                     | ZB89    | 4.000 | 3.133 | 1.213 | 0.818 | 0.697  | 0.156    |
|                     | ZB97    | 4.000 | 3.753 | 1.350 | 0.619 | 0.752  | 0.367    |
| Mean                | 4.636   | 3.088 | 1.225 | 0.749 | 0.655 | -0.183 |          |
| <i>Z. armatum</i>   | ZB2     | 1.000 | 1.000 | 0.000 | 0.000 | 0.000  | NA       |
|                     | ZB4     | 2.000 | 1.385 | 0.451 | 0.111 | 0.294  | 0.600    |
|                     | ZB11    | 4.000 | 1.421 | 0.634 | 0.222 | 0.314  | 0.250    |
|                     | ZB28    | 3.000 | 1.742 | 0.730 | 0.444 | 0.451  | -0.044   |
|                     | ZB30    | 2.000 | 1.670 | 0.591 | 0.556 | 0.425  | -0.385   |
|                     | ZB32    | 1.000 | 1.000 | 0.000 | 0.000 | 0.000  | NA       |
|                     | ZB43    | 1.000 | 1.000 | 0.000 | 0.000 | 0.000  | NA       |
|                     | ZB69    | 1.000 | 1.000 | 0.000 | 0.000 | 0.000  | NA       |
|                     | ZB73    | 2.000 | 1.528 | 0.530 | 0.444 | 0.366  | -0.286   |
|                     | ZB89    | 2.000 | 1.976 | 0.687 | 0.889 | 0.523  | -0.800   |
|                     | ZB97    | 3.000 | 2.455 | 0.965 | 0.889 | 0.628  | -0.500   |
| Mean                | 2.000   | 1.471 | 0.417 | 0.323 | 0.273 | 0.027  |          |

Note:  $N_a$ =Observed number of alleles,  $N_e$ =Effective number of alleles,  $I$ =Shannon's Information index,  $H_o$ =Observed heterozygosity,  $H_e$ =Expected heterozygosity, and  $F_{IS}$ =Fixation index



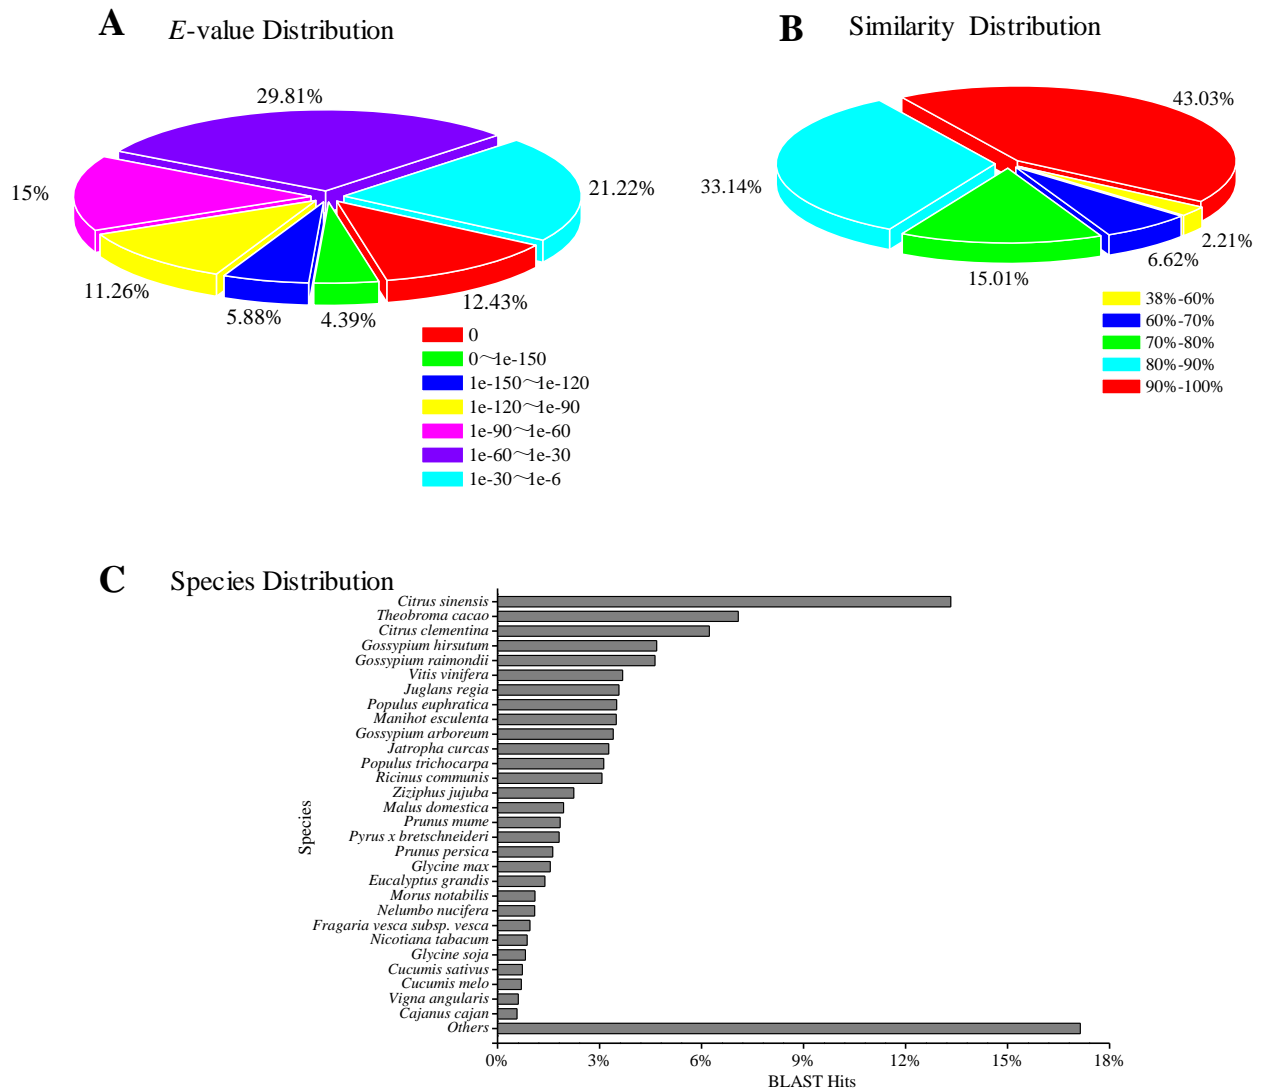

**Supplement Figure S2.** Characteristics of similarity of *Z. bungeanum* all-unigene against Nr database. (A) *E*-value distribution of all-unigene. (B) Similarity distribution of all-unigene. (C) Species distribution of all-unigene.

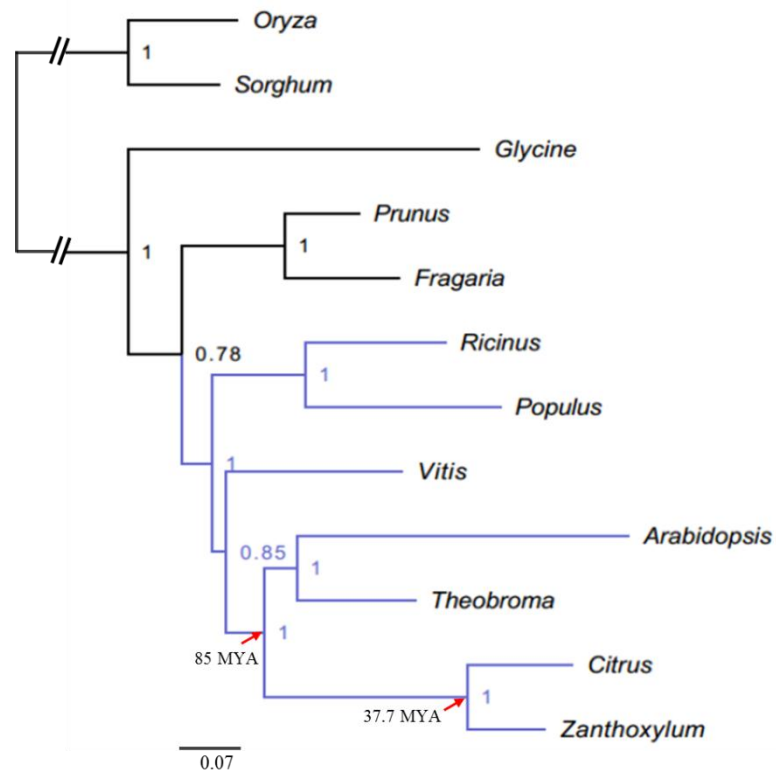

**Supplement Figure S3.** *Zanthoxylum* phylogeny on the basis of 68 chloroplast genes shared in *Zanthoxylum*, sweet orange (*Citrus sinensis*), poplar (*Populus euphratica*), grape (*Vitis aestivalis*), strawberry (*Fragaria × ananassa*), soybean (*Glycine max*), *Arabidopsis*, cacao (*Theobroma cacao*), peach (*Prunus persica*), castor bean (*Ricinus communis*). Rice (*Oryza sativa*) and sorghum (*Sorghum bicolor*) serve as out-groups. MYA, million years ago.

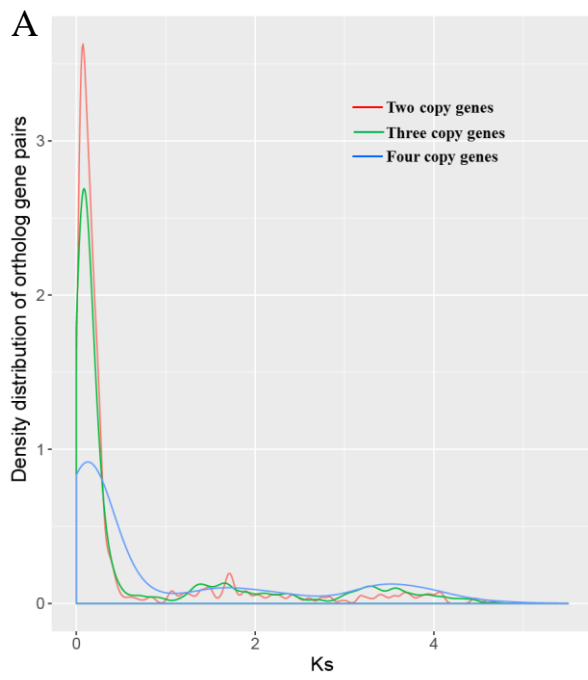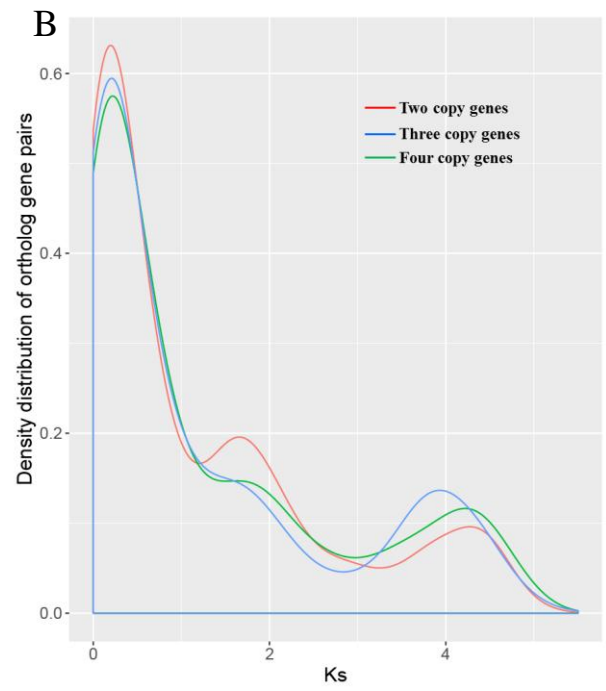

**Supplement Figure S4.** Distribution of synonymous substitution rates ( $K_s$ ) for gene pairs of multi-copy homologous genes of (A) *Zanthoxylum* and (B) *Citrus*.

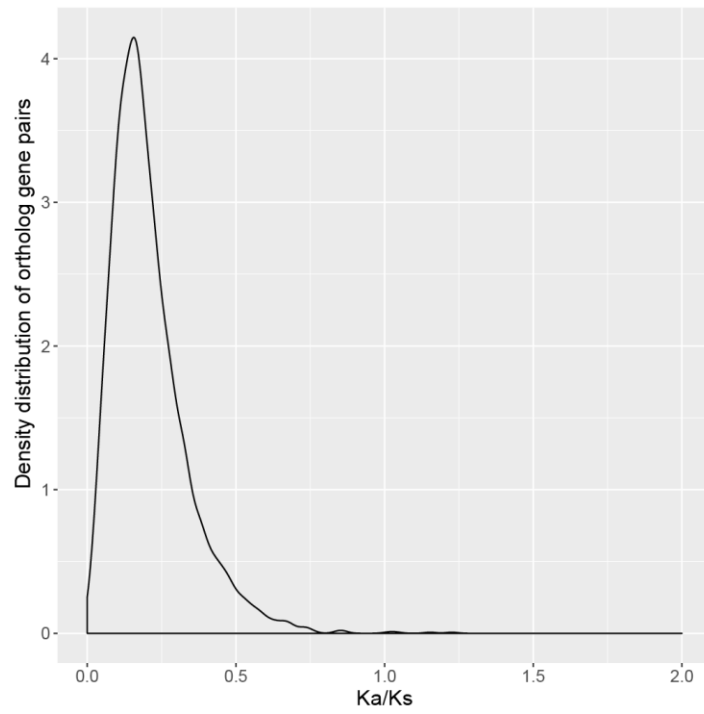

**Supplement Figure S5.** Ka/Ks distribution of *Zanthoxylum* coding sequences by referring to the *Citrus* genome.



***Zanthoxylum***  
**(unique genes 173)**

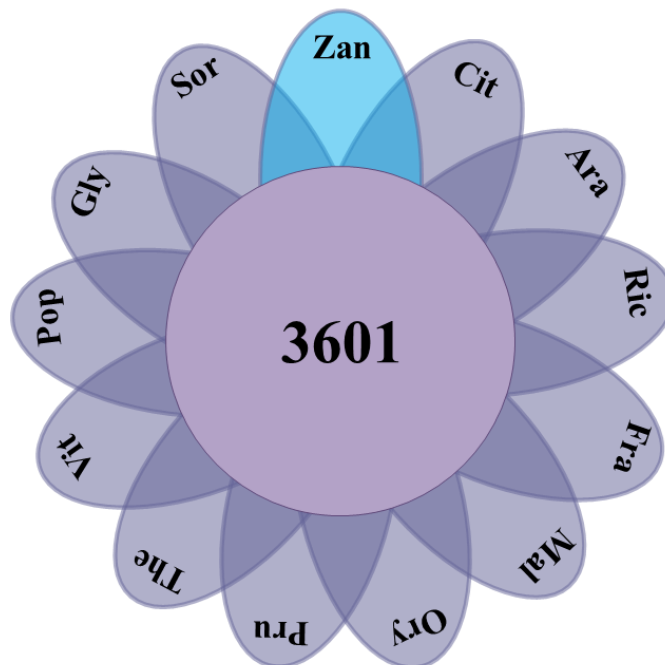

**Supplement Figure S6.** *Zanthoxylum*-specific genes identified by comparative analyses of *Zanthoxylum* protein coding sequences with 12 other plant genomes. Zan-*Zanthoxylum*, Cit-*Citrus*, Ara-*Arabidopsis*, Ric-*Ricinus*, Fra-*Fragaria*, Mal-*Malus*, Ory-*Oryza*, Pru-*Prunus*, The-*Theobroma*, Vit-*Vitis*, Pop-*Populus*, Gly-*Glycine*, and Sor-*Sorghum*.
